# Supplementary material for: Physical therapy treatment in children with cerebral palsy after single-event multilevel surgery: a qualitative systematic review. A first step towards a clinical guideline for physical therapy after single-event multilevel surgery
Source: PubMed Central journal article supplement — Ther Adv Chronic Dis. 2019 Jul 5;10:2040622319854241. doi: 10.1177/2040622319854241 (PMC6613059; doi:10.1177/2040622319854241), 2019-07-05
Supplement: Appendix_1_Searchstring_190414.pdf [file Appendix_1_Searchstring_190414.pdf]

## Appendix 1

### Searchstring PubMed

|                                                                                                                                                                                                                                                                                                                                                                                                                                                                                                                                                                                                        |
|--------------------------------------------------------------------------------------------------------------------------------------------------------------------------------------------------------------------------------------------------------------------------------------------------------------------------------------------------------------------------------------------------------------------------------------------------------------------------------------------------------------------------------------------------------------------------------------------------------|
| #1 Disease                                                                                                                                                                                                                                                                                                                                                                                                                                                                                                                                                                                             |
| "Cerebral Palsy" [Mesh] OR "Cerebral Palsy" [tw]                                                                                                                                                                                                                                                                                                                                                                                                                                                                                                                                                       |
| #2 Population                                                                                                                                                                                                                                                                                                                                                                                                                                                                                                                                                                                          |
| "Child" [Mesh] OR "Child, Preschool" [Mesh] OR "Adolescent" [Mesh] OR "Pediatrics" [Mesh] OR child [tw] OR schoolchild [tw] OR "child, preschool" [tw] OR adolescent [tw] OR pediatrics [tw] OR paediatrics [tw] OR boy [tw] OR boys [tw] OR boyhood [tw] OR girl [tw] OR girls [tw] OR girlhood [tw] OR youth [tw] OR youths [tw] OR teen [tw] OR teens [tw] OR teenager [tw] OR children [tw]                                                                                                                                                                                                        |
| 3 Physical therapy                                                                                                                                                                                                                                                                                                                                                                                                                                                                                                                                                                                     |
| "Physical Therapy Modalities" [Mesh] OR "Physical Therapy (Specialty)" [Mesh] OR "Physical Therapy" [tw] OR physiotherapy [tw] OR Rehabilitation [MeSH] OR Rehabilitation [Subheading] OR Rehabilitation [tw] OR "Exercise" [Mesh] OR "Muscle Stretching Exercises" [Mesh] OR "Motion Therapy, Continuous Passive" [Mesh] OR "Exercise Therapy" [Mesh] OR "Resistance Training" [Mesh] OR "Exercise" [tw] OR "Muscle Stretching Exercises" [tw] OR "Motion Therapy, Continuous Passive" [tw] OR "Exercise Therapy" [tw] OR "Resistance Training" [tw] OR "motor control" [tw] OR "motor learning" [tw] |
| #4 Surgery                                                                                                                                                                                                                                                                                                                                                                                                                                                                                                                                                                                             |
| "General Surgery" [Mesh] OR "Orthopedics" [Mesh] OR "Surgery" [tiab]                                                                                                                                                                                                                                                                                                                                                                                                                                                                                                                                   |
| #5 Combined searchstring                                                                                                                                                                                                                                                                                                                                                                                                                                                                                                                                                                               |
| #1 AND #2 AND #3 AND #4                                                                                                                                                                                                                                                                                                                                                                                                                                                                                                                                                                                |
