# Supplementary material for: Physical therapy treatment in children with cerebral palsy after single-event multilevel surgery: a qualitative systematic review. A first step towards a clinical guideline for physical therapy after single-event multilevel surgery
Source: PubMed Central journal article supplement — Ther Adv Chronic Dis. 2019 Jul 5;10:2040622319854241. doi: 10.1177/2040622319854241 (PMC6613059; doi:10.1177/2040622319854241), 2019-07-05
Supplement: Table_1_SEMLS_PTT_Quality_methodology_190414.pdf [file Table_1_SEMLS_PTT_Quality_methodology_190414.pdf]

**Table 1.** Quality methodology.

| Author (year) <sup>ref</sup>                  | Åkerstedt (2009) <sup>14</sup>                | Khan (2007) <sup>15</sup> | Patikas (2006) <sup>16</sup>                                                                      | Patikas (2006) <sup>17</sup> | Seniorou (2007) <sup>18</sup>                                                        | Thomason (2011) <sup>19</sup>   |
|-----------------------------------------------|-----------------------------------------------|---------------------------|---------------------------------------------------------------------------------------------------|------------------------------|--------------------------------------------------------------------------------------|---------------------------------|
| Design                                        | Prospectief Cohort                            | Retrospectief Cohort      | RCT                                                                                               | RCT                          | RCT                                                                                  | RCT                             |
| <i>internal validity</i>                      |                                               |                           |                                                                                                   |                              |                                                                                      |                                 |
| Randomly divided                              | dna                                           | dna                       | yes                                                                                               | yes                          | yes                                                                                  | yes                             |
| blind randomized                              | dna                                           | dna                       | yes                                                                                               | yes                          | no                                                                                   | yes                             |
| defined study                                 | yes                                           | no                        | yes                                                                                               | yes                          | yes                                                                                  | yes                             |
| Groups of identical baseline                  | dna                                           | dna                       | yes(SC)                                                                                           | yes (SC)                     | yes (SC)                                                                             | yes (SC)                        |
| blind subjects                                | dna                                           | dna                       | no                                                                                                | no                           | no                                                                                   | no                              |
| therapists blind                              | dna                                           | dna                       | no                                                                                                | no                           | no                                                                                   | no                              |
| testers blind                                 | ?                                             | no                        | no                                                                                                | no                           | no                                                                                   | no                              |
| Confounders / bias                            | ?                                             | yes                       | ?                                                                                                 | ?                            | ?                                                                                    | ?                               |
| Use valid, reproducible measuring instruments | yes                                           | yes                       | yes                                                                                               | yes                          | yes                                                                                  | yes                             |
| defining outcome                              | yes                                           | yes                       | Doubtful                                                                                          | Doubtful                     | Doubtful                                                                             | Doubtful                        |
| Intention to treat                            | dna                                           | dna                       | yes                                                                                               | no                           | no                                                                                   | yes                             |
| <i>external validity</i>                      |                                               |                           |                                                                                                   |                              |                                                                                      |                                 |
| Inclusion/exclusion numbers (n)               | yes<br>11                                     | yes<br>85                 | yes<br>39                                                                                         | yes<br>39                    | yes<br>20                                                                            | yes<br>19                       |
| Discription physicaltherapy intervention      | no                                            | no                        | no                                                                                                | no                           | no                                                                                   | no                              |
| Check co- intervention                        | no                                            | yes                       | no                                                                                                | no                           | no                                                                                   | yes                             |
| Follow- up duration enough                    | yes                                           | yes                       | yes                                                                                               | yes                          | yes                                                                                  | yes                             |
| Loss to follow- up< no0%                      | yes                                           | yes                       | yes                                                                                               | yes                          | yes                                                                                  | yes                             |
| <i>results</i>                                |                                               |                           |                                                                                                   |                              |                                                                                      |                                 |
| Mean                                          | yes                                           | no                        | yes                                                                                               | yes                          | yes                                                                                  | yes                             |
| Standaard deviation                           | no                                            | no                        | yes                                                                                               | yes                          | yes                                                                                  | yes                             |
| 95 % confidence interval                      | no                                            | no                        | yes                                                                                               | yes                          | no                                                                                   | yes                             |
| statistical analysis                          | - Descriptive statistics<br>- Visual Analysis | no                        | - Within and between factor<br>- ANCOVA<br>- Unpaired t- tests<br>- Chi- square<br>nonpara. stat. | - ANCOVA<br>- ANOVA          | - within subject standard deviation<br>- CV %<br>- paired sample t-tests<br>- ANCOVA | - ANCOVA<br>- lineair regresion |

ANCOVA: analysis of covariance, ANOVA: analysis of variance, CV: coefficients of variation, SC: statistical correction, dna: does not apply, ?: uncertain.
